# Supplementary material for: Global sensitivity analysis of the Indian monsoon during the Pleistocene
Source: Copernicus journal article supplement (doi:10.5194/cp-11-45-2015), 2015-01-12
Supplement: Supplementary file 2 [file cp-11-45-2015-supplement.zip]

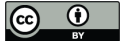

## *Supplement of*

# **Global sensitivity analysis of the Indian monsoon during the Pleistocene**

**P. A. Araya-Melo et al.**

*Correspondence to:* M. Crucifix ([michel.crucifix@uclouvain.be](mailto:michel.crucifix@uclouvain.be))

- cp-11-45-2015-supplement-cover-letter.pdf
- Data
  - RData
    - \* MAR\_4.rda
    - \* VA\_conjugate.rda
    - \* exp\_output.rda
    - \* lambda.rda
  - Raw
    - \* NO\_Orog\_data
    - \* Orog\_data
  - Txt
    - \* No\_Orog.txt
    - \* Orog\_full.txt
    - \* Orog\_without\_11\_40.txt
- GP\_0.1.3.tar.gz
- README.txt
- R\_Plots
  - plot\_mar.R
  - plot\_var\_anal.R
- R\_Scripts
  - .optim\_lambda.R.swp
  - dependence\_on\_ice.R
  - emulator\_11o.R
  - figure\_rho.R

- figure\_rho.Rout
- optim\_lambda.R
- read\_data.R
- rhoarray.R
- variance\_analysis.R

- Visualizer

- read\_orog.R
- setvar.sh
- visualiser.py

- emulator\_demo\_with\_subtitles.mov

- supplement.pdf

- supplement.tex
